# Supplementary material for: Acute, Low-Dose Neutron Exposures Adversely Impact Central Nervous System Function
Source: MDPI journal article supplement (doi:10.3390/ijms22169020), 2021-08-21
Supplement: s1 [file s1]

**Supplementary Table S1. Action potential characteristics of CA1 pyramidal neurons are not altered by acute neutron irradiation.** Action potential (AP) properties in whole cell current clamp recordings of CA1 pyramidal neurons from the superficial layer of the dorsal hippocampus were measured 3-5 months after acute exposure to 18 cGy neutron irradiation.

| Parameter                   | Mean [95% CI]           |                        | Mean Difference [95% CI] | Cohen's d [95% CI]     | MLM z-Value | MLM p-Value |
|-----------------------------|-------------------------|------------------------|--------------------------|------------------------|-------------|-------------|
|                             | 0 cGy                   | 18 cGy                 |                          |                        |             |             |
| AP height (mV)              | 88.9<br>[81.4, 96.3]    | 84.1<br>[76.9, 91.2]   | -4.80<br>[-13.26, 5.01]  | -0.36<br>[-1.14, 0.41] | 0.81        | 0.417       |
| AP width (ms)               | 0.83<br>[0.74, 0.92]    | 0.89<br>[0.74, 1.04]   | 0.06<br>[-0.09, 0.22]    | 0.28<br>[-0.49, 1.07]  | 0.77        | 0.444       |
| Afterhyperpolarization (mV) | -15.4<br>[-18.7, -12.1] | -13.4<br>[-17.8, -9.1] | 1.98<br>[-3.04, 6.54]    | 0.29<br>[-0.49, 1.10]  | 0.75        | 0.453       |

**Supplementary Table S2. Characteristics of synaptic inputs to CA1 pyramidal neurons are unchanged following acute neutron irradiation.** Spontaneous excitatory postsynaptic current (sEPSC) and inhibitory postsynaptic current (sIPSC) properties in whole cell voltage clamp recordings of CA1 pyramidal neurons from the superficial layer of the dorsal hippocampus were measured 3-5 months after acute exposure to 18 cGy neutron irradiation.

| Parameter                  | Mean [95% CI]            |                          | Mean Difference [95% CI] | Cohen's d [95% CI]     | MLM z-Value | MLM p-Value |
|----------------------------|--------------------------|--------------------------|--------------------------|------------------------|-------------|-------------|
|                            | 0 cGy                    | 18 cGy                   |                          |                        |             |             |
| sEPSC rise time (ms)       | 2.40<br>[2.25, 2.55]     | 2.40<br>[2.27, 2.53]     | 0.00<br>[-0.19, 0.16]    | 0.00<br>[-0.76, 0.76]  | 0.00        | 0.997       |
| sEPSC charge transfer (pC) | -98.1<br>[-111.2, -85.0] | -83.3<br>[-102.3, -64.2] | 14.8<br>[-9.2, 33.2]     | 0.52<br>[-0.40, 1.38]  | 1.47        | 0.142       |
| sEPSC decay tau (ms)       | 4.71<br>[4.00, 5.41]     | 5.68<br>[3.82, 7.53]     | 0.97<br>[-0.30, 3.57]    | 0.40<br>[-0.37, 1.00]  | 1.04        | 0.297       |
| sIPSC rise time (ms)       | 3.28<br>[3.02, 3.53]     | 3.39<br>[3.11, 3.67]     | 0.11<br>[-0.23, 0.44]    | 0.24<br>[-0.60, 1.02]  | 0.57        | 0.570       |
| sIPSC charge transfer (pC) | 484.7<br>[286.6, 682.7]  | 356.5<br>[292.0, 421.1]  | -128.1<br>[-385.2, 8.1]  | -0.49<br>[-1.00, 0.30] | 0.91        | 0.364       |
| sIPSC decay tau (ms)       | 7.59<br>[6.88, 8.31]     | 7.10<br>[6.45, 7.76]     | -0.49<br>[-1.31, 0.36]   | -0.42<br>[-1.14, 0.40] | 1.08        | 0.281       |
